# Supplementary material for: The eag domain regulates hERG channel inactivation gating via a direct interaction
Source: PubMed Central journal article supplement — J Gen Physiol. 2013 Feb;141(2):229–41. doi: 10.1085/jgp.201210870 (PMC3557309; doi:10.1085/jgp.201210870), 2013-02
Supplement: supp_jgp.201210870_JGP_201210870_sm.pdf [file supp_jgp.201210870_JGP_201210870_sm.pdf]

Gustina and Trudeau, <http://www.jgp.org/cgi/content/full/jgp.201210870/DC1>

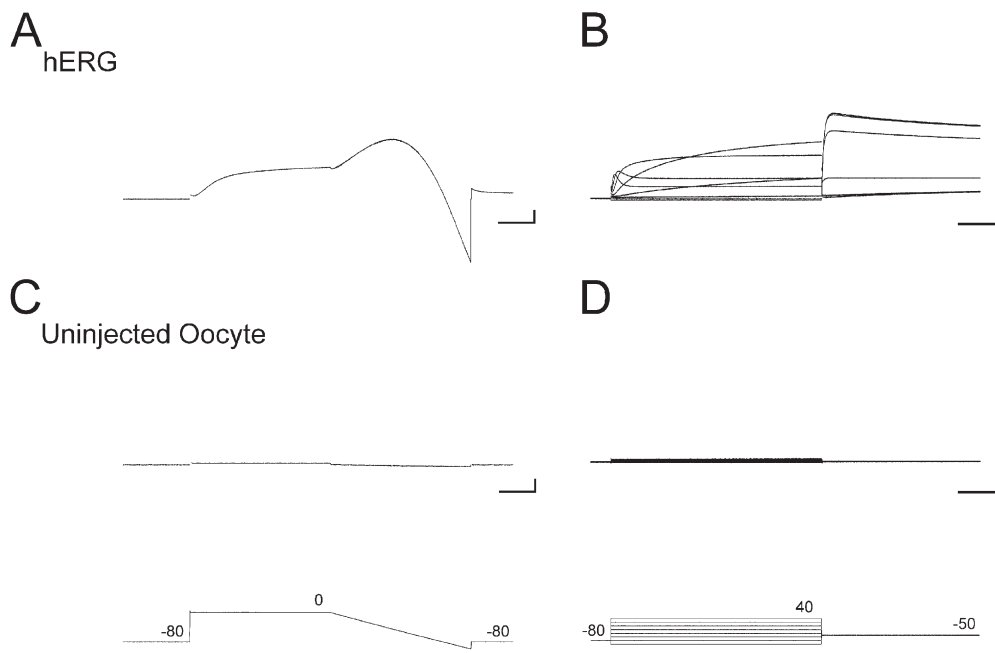

**Figure S1.** Blank (uninjected) oocytes have negligible current responses. (A–D) Two-electrode voltage-clamp recordings of currents from hERG (A and B) and blank oocytes (C and D). Currents were elicited using the pulse protocols shown. Calibration bars, 1  $\mu$ A and 50 ms for the ramp currents in A and C, and 1  $\mu$ A and 200 ms for the family of currents in B and D.
